# Supplementary material for: Enzyme-assisted extraction of anti-inflammatory compounds from habanero chili pepper (Capsicum chinense) seeds
Source: Frontiers journal article supplement (doi:10.3389/fnut.2022.942805), 2022-09-08
Supplement: Image_1.pdf [file Image_1.pdf]

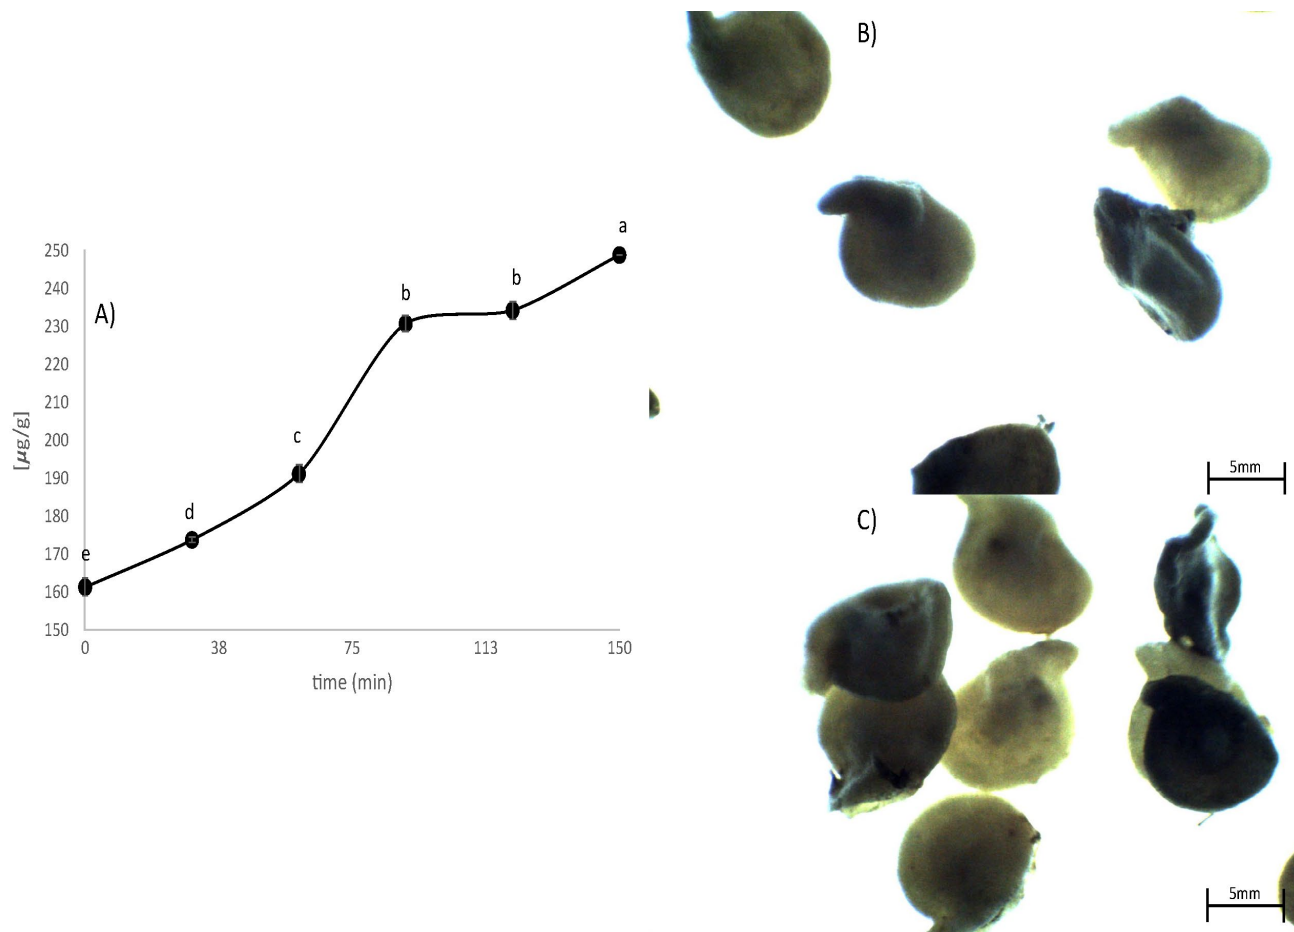

Supplementary Figure 1. Soluble carbohydrates extracted with water from chili pepper seeds at different times of cellulase (2500 UI/L) treatment at 30 °C (A) and photographs of the seeds before (B) and after 150 minutes of enzymatic treatment (C)
